1 **Comparison of the human gastric microbiota in hypochlorhydric states arising**  
2 **as a result of *Helicobacter pylori*-induced atrophic gastritis, autoimmune**  
3 **atrophic gastritis and proton pump inhibitor use**

4 **Bryony N. Parsons<sup>1#</sup>, Umer Zeeshan Ijaz<sup>2#</sup>, Rosalinda D'Amore<sup>3</sup>, Michael D.**  
5 **Burkitt<sup>1,7</sup>, Richard Eccles<sup>3</sup>, Luca Lenzi<sup>3</sup>, Carrie A. Duckworth<sup>1</sup>, Andrew R.**  
6 **Moore<sup>1,7</sup>, Laszlo Tizslavicz<sup>6</sup>, Andrea Varro<sup>1</sup>, Neil Hall<sup>3,4,5</sup> and D. Mark**  
7 **Pritchard<sup>1,7\*</sup>**

8 *<sup>1</sup>Department of Cellular and Molecular Physiology, Institute of Translational*  
9 *Medicine, University of Liverpool, Crown Street, Liverpool, L69 3GE, UNITED*  
10 *KINGDOM.*

11 *<sup>2</sup>University of Glasgow, Rankine Building, School of Engineering, Oakfield Avenue,*  
12 *Glasgow G12 8LT, UNITED KINGDOM*

13 *<sup>3</sup>Centre for Genomic Research, Institute of Integrative Biology, University of*  
14 *Liverpool, Crown Street, Liverpool, L69 7ZB, UNITED KINGDOM.*

15 *<sup>4</sup>The Earlham Institute Norwich Research Park Norwich, NR4 7UH*

16 *<sup>5</sup>School of Biological Sciences, University of East Anglia, Norwich Research Park,*  
17 *Norwich, Norfolk, NR4 7TJ, UNITED KINGDOM*

18 *<sup>6</sup>Department of Pathology, University of Szeged, HUNGARY*

19 *<sup>7</sup>Royal Liverpool and Broadgreen University Hospitals NHS Trust, Prescot St,*  
20 *Liverpool, L7 8XP, UNITED KINGDOM*

21 \* Corresponding author D. Mark Pritchard Tel: +44 151 794 5772 Email:  
22 dmpritch@liverpool.ac.uk

23 # These authors contributed equally

24 **Key words:** Gastric, hypochlorhydria, PPI, microbiota, atrophy, Helicobacter

25

26

27

28 **ABSTRACT**

29 **Objective:** Several conditions associated with reduced gastric acid secretion confer  
30 an altered risk of developing a gastric malignancy. *Helicobacter pylori*-induced  
31 atrophic gastritis predisposes to gastric adenocarcinoma, autoimmune atrophic  
32 gastritis is a precursor of type I gastric neuroendocrine tumours, whereas proton  
33 pump inhibitor (PPI) use does not affect stomach cancer risk. We hypothesised that  
34 each of these conditions was associated with specific alterations in the gastric  
35 microbiota and that this influenced subsequent tumour risk.

36 **Design:** 95 patients (in groups representing normal stomach, PPI treated, *H. pylori*  
37 gastritis, *H. pylori*-induced atrophic gastritis and autoimmune atrophic gastritis) were  
38 selected from a cohort of 1400. RNA extracted from gastric corpus biopsies was  
39 analysed using 16S rRNA sequencing (MiSeq).

40 **Results:** Samples from normal stomachs and patients treated with PPIs  
41 demonstrated similarly high microbial diversity. Patients with autoimmune atrophic  
42 gastritis also exhibited relatively high microbial diversity, but with samples dominated  
43 by *Streptococcus*. *H. pylori* colonisation was associated with decreased microbial  
44 diversity and reduced complexity of co-occurrence networks. *H. pylori*-induced  
45 atrophic gastritis resulted in lower bacterial abundances and diversity, whereas  
46 autoimmune atrophic gastritis resulted in greater bacterial abundance and equally  
47 high diversity compared to normal stomachs. Pathway analysis suggested that  
48 glucose-6-phosphate-1-dehydrogenase and D-lactate dehydrogenase were over  
49 represented in *H. pylori*-induced atrophic gastritis versus autoimmune atrophic  
50 gastritis, and that both these groups showed increases in fumarate reductase.

51 **Conclusion:** Autoimmune and *H. pylori*-induced atrophic gastritis were associated  
52 with different gastric microbial profiles. PPI treated patients showed relatively few  
53 alterations in the gastric microbiota compared to healthy subjects.

54

## 55 **SIGNIFICANCE OF THIS STUDY**

### 56 **1. What is already known about this subject?**

- 57 • Some conditions which result in reduced gastric acid secretion and  
58 hypochlorhydria are associated with an increased risk of gastric tumourigenesis.
- 59 • This risk is different in patients with *H. pylori*-induced atrophic gastritis,  
60 autoimmune atrophic gastritis and chronic proton pump inhibitor use.
- 61 • Hypochlorhydria and *H. pylori* infection cause alterations in the composition of  
62 the gastric microbiota.

### 63 **2. What are the new findings?**

- 64 • We used 16S rRNA sequencing to characterise the microbiota in gastric corpus  
65 biopsies from a well characterised cohort of patients.
- 66 • The gastric microbiota was different in patients who were hypochlorhydric as a  
67 result of *H. pylori*-induced atrophic gastritis, autoimmune atrophic gastritis and  
68 proton pump inhibitor use.
- 69 • Biochemical pathways associated with gastric carcinogenesis such as the  
70 fumarate reductase pathway were predicted to be altered in patients with  
71 atrophic gastritis.

### 72 **3. How might it impact on clinical practice in the foreseeable future?**

- 73 • Understanding how the microbiota that colonise the hypochlorhydric stomach  
74 influence gastric carcinogenesis may ultimately permit stratification of patients'  
75 subsequent tumour risk.
- 76 • Interventions that alter the composition of the gastric microbiome in  
77 hypochlorhydric patients with atrophic gastritis should be tested to investigate  
78 whether they alter the subsequent risk of developing gastric malignancy.

79 **INTRODUCTION**

80 Gastric adenocarcinoma is the third most common cause of cancer related mortality  
81 worldwide[1] and most cases are associated with chronic *Helicobacter pylori*  
82 infection. Gastric cancer usually develops via the premalignant condition of gastric  
83 atrophy, which is associated with the loss of acid-secreting parietal cells[2]. The  
84 resulting hypochlorhydria potentially leads to alterations in the composition of the  
85 gastric microbiota by providing a more favourable environment for colonisation. It is  
86 currently unclear to what extent the non-*H. pylori* gastric microbiota contributes  
87 towards gastric carcinogenesis. Although the hypochlorhydria associated with  
88 autoimmune atrophic gastritis also increases the risk of developing gastric  
89 adenocarcinoma[3], it is more frequently associated with the development of another  
90 tumour, the type I gastric neuroendocrine tumour (NET)[4]. However,  
91 hypochlorhydria does not always increase the risk of gastric tumour development, as  
92 observed following chronic proton pump inhibitor (PPI) use[5]. Therefore, factors in  
93 addition to hypochlorhydria affect gastric cancer risk and one of these could be the  
94 gastric microbiota.

95 Although originally thought to be sterile, several bacterial communities have been  
96 shown to survive in the normal human stomach[6]. Differences have also been  
97 observed depending upon *H. pylori* status[6]. There is now overwhelming evidence  
98 that certain bacteria influence cancer development. Potential mechanisms include  
99 altering the host immune system, exacerbating inflammation, or converting dietary  
100 nitrates to produce carcinogens such as N-nitrosamines and nitric oxide[7, 8, 9, 10,  
101 11, 12, 13].

102 We therefore hypothesised that three stimuli which result in hypochlorhydria, namely  
103 *H. pylori*-induced atrophic gastritis, autoimmune atrophic gastritis and proton pump

104 inhibitor use cause specific changes to the composition of the gastric microbiota. In  
105 addition, the gastric microbiota that is present in these conditions contributes  
106 towards the specific gastric tumour risk that is associated with each of these  
107 hypochlorhydric states. We have used 16S rRNA sequencing to determine the  
108 gastric mucosal microbiota profiles in patients with these causes of hypochlorhydria  
109 and have compared these with samples obtained from healthy subjects and from  
110 patients with *H. pylori*-induced gastritis, but no evidence of gastric atrophy.

111 **METHODS**

112 **Ethics**

113 Acquisition of the biopsies used in this study was approved by Liverpool  
 114 (08/H1005/37) and Cambridge East (10/H0304/51) Research Ethics Committees as  
 115 previously described[14, 15]. All patients gave written informed consent.

116 **Patients**

117 One hundred gastric biopsy samples in 5 different groups were selected from a  
 118 cohort of 1400 prospectively recruited patients who underwent diagnostic upper  
 119 gastrointestinal endoscopy at Royal Liverpool University Hospital[14] and from 8  
 120 patients with type I gastric NETs who had been recruited to a clinical trial[15, 16]  
 121 (Table 1).

122 **Table 1.** Summary of patient group characteristics

|   | Group                      | Total no. of samples | Number of females | Age (years) |           | BMI    |           | <i>H. pylori</i> serology +ve | <i>H. pylori</i> histology /urease +ve | PPI use | Atrophic gastritis | Serum gastrin (pM) |           | Anti GPC/IF antibody |
|---|----------------------------|----------------------|-------------------|-------------|-----------|--------|-----------|-------------------------------|----------------------------------------|---------|--------------------|--------------------|-----------|----------------------|
|   |                            |                      |                   | Median      | IQR       | Median | IQR       |                               |                                        |         |                    | Median             | IQR       |                      |
| 1 | Normal                     | 20                   | 13                | 46          | 30.5-58.7 | 24.5   | 21.2-26.8 | 0                             | 0                                      | -       | -                  | 22.5               | 17.5-28.5 | - or ND              |
| 2 | PPI treated                | 19                   | 13                | 60          | 46-67     | 28.5   | 26.1-33.2 | 0                             | 0                                      | +       | -                  | 140                | 94-200    | - or ND              |
| 3 | <i>H. pylori</i> gastritis | 22                   | 11                | 57.5        | 47.7-64   | 27.4   | 23.3-27.1 | 22                            | 22                                     | -       | -                  | 21.5               | 17.4-28   | - or ND              |
| 4 | <i>H. pylori</i> atrophy   | 23                   | 15                | 65          | 55-72     | 25.9   | 24.6-31.9 | 23                            | 6                                      | -       | +                  | 100                | 64-260    | - or ND              |
| 5 | Autoimmune atrophy         | 11                   | 6                 | 67          | 60-76     | 28.6   | 23.7-35   | 2                             | 0                                      | -       | +                  | 800                | 470-1050  | +                    |

123

124 ND= Not done

125 IQR= Interquartile range, 25% and 75%

126

127



128 Patients in the normal stomach group had a normal endoscopy, no evidence of *H.*  
129 *pylori* infection by histology, rapid urease test or serology, were not taking a PPI and  
130 were normogastrinaemic. Patients belonging to the *H. pylori* gastritis group were  
131 positive for *H. pylori* by rapid urease test, histology and serology, had no histological  
132 evidence of atrophic gastritis, were not taking a PPI and were normogastrinaemic.  
133 Patients in the *H. pylori*-induced atrophic gastritis group showed histological  
134 evidence of corpus atrophic gastritis and/or intestinal metaplasia, had no dysplasia  
135 or cancer, were positive for *H. pylori* by serology, were not taking a PPI and were  
136 hypergastrinaemic. Six out of the 23 patients in this group were also *H. pylori*  
137 positive by urease test and/or histology. Patients in the autoimmune atrophic gastritis  
138 group had histological evidence of atrophic gastritis, no evidence of *H. pylori*  
139 infection by rapid urease test or histology, positive anti-gastric parietal cell and/or  
140 intrinsic factor antibodies, were markedly hypergastrinaemic and 8 out of 11 also had  
141 grade 1 type I gastric NETs. Patients in the PPI-treated group were currently taking  
142 PPIs, had no evidence of *H. pylori* infection by serology, rapid urease test or  
143 histology, had no histological evidence of atrophic gastritis and were  
144 hypergastrinaemic (suggesting significant hypochlorhydria).

## 145 **Samples**

146 At least two biopsies per site were obtained from the gastric antrum and corpus for  
147 histopathology. Eight additional corpus biopsies were stored in RNA later  
148 immediately after removal and were extracted using a modified Tri- reagent  
149 protocol[17]. Briefly, samples were thawed and separated from RNA later, before  
150 being homogenised in Tri-Reagent® (Sigma-Aldrich, Gillingham, UK). Chloroform  
151 was added and the resulting clear aqueous layer was combined with isopropanol  
152 before centrifugation to produce a precipitated RNA pellet. This was washed with

153 75% and 100% ice cold ethanol before being allowed to dry and then resuspended in  
154 diethylpyrocarbonate (DEPC)-treated water (Sigma-Aldrich, Gillingham, UK). RNA  
155 was stored in ethanol at -80°C. Ethanol was removed and pellets were resuspended  
156 in DEPC-water prior to reverse transcription.

### 157 **Gastrin assays**

158 Serum gastrin concentrations were measured by radioimmunoassay (RIA) as  
159 previously described[18, 19]. Fasting serum gastrin concentrations were all <40pM in  
160 normogastrinaemic subjects and >40pM (with the majority >100pM) in  
161 hypergastrinaemic subjects.

### 162 **Reverse Transcription**

163 Samples and random primers were denatured together for 5 minutes at 65°C before  
164 Proto reaction mix and Proto enzyme from a ProtoScript® II First Strand cDNA  
165 Synthesis kit (NEB, E6560L) were added. Samples were then incubated at 25°C for  
166 5 minutes, 42°C for 20 minutes, and 80°C for 5 minutes. Newly synthesised cDNA  
167 was then measured using a Qubit high sensitivity assay (ThermoFisher Ltd, Paisley,  
168 UK).

### 169 **16S rRNA Sequencing**

170 The 16S rRNA gene was targeted using V1-V2 (27F and 388R) primers[20] with  
171 slight modifications: forward primer 5'ACACTCTTTCCCTACACGACGC  
172 TCTTCCGATCTNNNNNAGAGTTTGATCMTGGCTCAG'3, reverse primer  
173 5'GTGACTGGAGTTCAGACGTGTGCTCTTCCGATCTGCTGCCTCCCGTAGGAGT'  
174 3. Primers were validated using a mock community described in supplementary  
175 methods. The following cycling conditions were used: initial denaturation 94°C for 5

176 minutes, followed by 10 cycles of denaturation at 98°C for 20 seconds, annealing at  
177 60°C for 15 seconds, and elongation at 72°C for 15 seconds, followed by a final  
178 elongation step of 72°C for 1 minute. PCR amplicons were purified to remove excess  
179 primers, nucleotides, salts, and enzymes using the Agencourt® AMPure® XP  
180 system (Beckman Coulter Ltd, High Wycombe, UK). Purified amplicons were used in  
181 a second PCR reaction with the same conditions except with 20 cycles. This second  
182 step was used to add dual index barcodes. The PCR amplicons were purified as  
183 above. All PCR reactions used Kapa HiFi HotStartStart 2x master mix (Anachem  
184 Ltd, Bedfordshire, UK) and all primers were used at 10µM. Amplicon sizes were  
185 checked using a fragment analyser (Advanced Analytical, Ankeny, USA) and size  
186 selection was performed using a Pippin prep (Sage Science, Beverly, USA). The  
187 quantity and quality of the samples in the final libraries were checked using a SYBR  
188 Green qPCR assay and the Illumina Library Quantification kit (Kapa) on a Roche  
189 Light Cycler LC480II, according to the manufacturer's instructions.

190 Prior to loading samples onto the MiSeq, PhiX was added (10-15%) to increase  
191 diversity, and samples were then denatured with NaOH according to the Illumina  
192 MiSeq protocol. ssDNA library fragments were diluted to a final concentration of  
193 8pM. 600µl of ssDNA library was loaded into a MiSeq Reagent Cartridge and a 500–  
194 cycle PE kit v2 was used. Paired-end sequencing was performed according to the  
195 manufacturer's instructions (Illumina, SanDiego, CA, USA). Sequence analysis  
196 methodology is described in the supplementary methods. Reads were submitted to  
197 EBI short-read archive accession-PRJEB21104.

## 198 **Statistical analysis**

199 Details are described in the supplementary methods.

## 200 **RESULTS**

### 201 **Patient characteristics**

202 Patients were selected from the larger cohort according to criteria defined above.

203 Characteristics of the selected patients are shown in table 1 and figure 1A. One

204 sample from the normal stomach group and four from the PPI-treated group were

205 subsequently excluded because sequencing showed the presence of >15% *H. pylori*

206 despite this organism being undetected by conventional clinical tests (most likely due

207 to the higher sensitivity of 16S rRNA sequencing compared to routine clinical tests).

208 Ninety-five samples were therefore analysed. Negative extracts from the RNA

209 extraction procedures, a water sample in the first PCR and a mock bacterial

210 community were also sequenced.

211

### 212 **Detection of Operational Taxonomic Units (OTUs)**

213 In total 10,386 OTUs were identified. Extraction controls contained fewer OTUs than

214 the patient samples, whilst the mock communities (and a random selection of 10

215 gastric samples – data not shown) showed consistency between MiSeq runs (Figs 1-

216 3). Despite the negative extracts being theoretically sterile, as expected they

217 generated 16S signals due to known background reagent contamination[21].

218 Samples from the autoimmune atrophic gastritis group contained the largest number

219 of OTUs, whilst all other patient groups were comparable (Fig 1B). Mock

220 communities demonstrated the expected bacterial ratios (Fig 3B).

221

222

223 **Bacterial diversity and abundance in the different hypochlorhydric states**

224 Twenty-three known phyla were identified, mainly Proteobacteria, Firmicutes,  
225 Bacteroidetes, Actinobacteria, Fusobacteria and Cyanobacteria. Bacteroidetes,  
226 followed by Proteobacteria and Firmicutes were most common in normal stomachs,  
227 whereas samples from PPI-treated patients contained slightly more Firmicutes and  
228 fewer Bacteroidetes. The *H. pylori* gastritis and *H. pylori* atrophic gastritis samples  
229 were dominated by Proteobacteria (as *Helicobacter* itself is a member of this  
230 phylum), whilst biopsies from patients with autoimmune atrophic gastritis contained  
231 the largest proportion of Firmicutes compared to all other patient groups.

232 *Alpha diversity*

233 Diversity indices demonstrated that the microbiota in normal stomachs was  
234 significantly more diverse than in the stomachs of all other patient groups except for  
235 the patients who had autoimmune atrophic gastritis (Fig 2). Evaluation of evenness  
236 (by Pielou's evenness and Simpson) suggested that the samples from normal  
237 stomachs and from the stomachs of patients taking PPIs contained bacterial  
238 communities that were more equal in abundance than those in the other patient  
239 groups, which were more skewed (Fig 2). Calculations based on richness indicated  
240 that the samples from normal stomachs also contained the greatest number of  
241 different bacterial species compared to all other groups, whilst the two *H. pylori*  
242 infected groups (*H. pylori*-induced gastritis and atrophy) contained significantly fewer  
243 species.

244

245

246 *Beta diversity*

247 When beta diversity was explored using nonmetric distance scaling (NMDS), patient  
248 groups clustered predominantly by bacterial abundance (Fig 4). When *H. pylori* was  
249 removed from the analysis however, *H. pylori* gastritis patients no longer clustered  
250 separately by abundance from subjects with normal stomachs (Fig 4). Despite this,  
251 following removal of *H. pylori*, there was a significant difference in abundance for *H.*  
252 *pylori*-induced atrophic gastritis patients compared to normal stomachs, suggesting  
253 strongly that there are differences in the proportions of non-*H. pylori* bacteria in these  
254 subjects compared with others (Fig 4). Samples from patients who had autoimmune  
255 atrophic gastritis displayed the only significant differences in terms of the presence  
256 or absence of specific bacteria compared to other groups (Fig 4). This suggests that  
257 changes in the gastric bacterial community during hypochlorhydria usually involve  
258 changes in the relative proportions of bacteria that are already present, and only  
259 rarely involve the loss or gain of specific bacterial genera.

260

261 **Comparisons between the microbiota profiles in the different patient groups**  
262 **and healthy controls**

263 *Normal stomach versus PPI treated patients*

264 Patients receiving PPIs showed similar bacterial profiles to those found in the  
265 stomachs of normal subjects, despite having significantly higher serum gastrin  
266 concentrations (suggesting the presence of hypochlorhydria) (Figs 1A, 3 & S1).  
267 Nonetheless there were differences in the ranks of most abundant bacterial families.  
268 In normal (control) patients Prevotellaceae were the most abundant bacterial family

269 (23%), followed by Streptococcaceae (10%), Paraprevotellaceae (7%) and  
270 Fusobacteriaceae (5%); amongst PPI-treated individuals Streptococcaceae (17%)  
271 outranked Prevotellaceae (11%), Campylobacteraceae (5%) and Leptotrichiaceae  
272 (4%; Fig 3A). The only significant differences at genus level between these groups  
273 were decreases in *Actinobacillus* and *Tannerella* in the PPI-treated stomachs (Table  
274 S1).

275 Very few differences were identified in co-occurrence network analyses when the  
276 microbiota in normal stomachs was compared to PPI-treated stomachs. The only  
277 observed difference was a negative correlation between *Helicobacter* and  
278 *Acinetobacter* in the PPI-treated samples, whereas this relationship was positively  
279 correlated in normal stomach biopsies (Figs 5A, S2A & Table S2A). Predicted  
280 pathway analysis showed no significantly different biochemical pathways between  
281 these two groups (Table S3).

282

### 283 *Normal stomach versus H. pylori-induced gastritis*

284 Unsurprisingly, the microbiota in the stomachs of patients who had *H. pylori*-induced  
285 gastritis consisted almost entirely of Helicobacteraceae (97%) (Fig 3). When  
286 compared to normal patients, *H. pylori*-induced gastritis patients showed a greater  
287 number of differences at the genus level than all other patient groups (Table S1).

288 The majority of these differences resulted from reductions in the proportions of  
289 several bacterial genera within the *H. pylori* gastritis group. To ensure that the  
290 dominance of *H. pylori* did not skew the proportions of the other bacteria in a  
291 misrepresentational way, *H. pylori* OTUs were removed from the abundance table  
292 followed by differential expression analysis on the remaining raw abundances. This

293 analysis resulted in almost identical results to when *H. pylori* remained (Table S1).  
294 Due to the dominance of *H. pylori* in these patients, very few co-occurrence networks  
295 were identified, but positive correlations were observed between *Kocuria* and  
296 *Skermanella* in both groups (Figs 5A & B). Predicted pathway analysis suggested a  
297 reduction in several dehydrogenases in the stomachs of patients who had *H. pylori*  
298 gastritis (Table S3).

299

### 300 *Normal stomach versus H. pylori-induced atrophic gastritis*

301 The stomachs of patients who had *H. pylori*-induced atrophic gastritis were also  
302 dominated by Helicobacteraceae (62%), followed by Streptococcaceae (5%),  
303 Fusobacteriaceae (2%) and Prevotellaceae (2%) (Fig 3). At the genus level, several  
304 differences were observed between normal stomachs and the stomachs of patients  
305 with *H. pylori*-induced atrophic gastritis. These included decreases in the proportions  
306 of *Tannerella* (*E. coli*/*Shigella*/*Salmonella*), *Treponema*, and *Prevotella* in the *H.*  
307 *pylori*-induced atrophic gastritis group. The vast majority of these differences  
308 remained when *H. pylori* was removed from the analysis (Table S1). Prevotellaceae  
309 were generally lower in all patient groups compared to normal stomachs (Figs S1  
310 and 3). As with the *H. pylori* gastritis group, the majority of these changes reflected  
311 decreases in the proportions of various bacterial genera within the *H. pylori*-induced  
312 atrophic gastritis group, with the only increase being in *Helicobacter* itself.

313 Co-occurrence networks were more complicated in *H. pylori*-induced atrophic  
314 gastritis patients compared to those subjects who had *H. pylori*-induced gastritis  
315 (Figs 5B & D). Clear negative relationships were observed between *Helicobacter* and  
316 genera such as *Streptococcus*, whilst *Campylobacter*, *Prevotella*, *Haemophilus* and



317 *Veillonella* were amongst the most well-connected and influential bacteria observed  
318 in the stomachs of *H. pylori* atrophic gastritis patients (Fig 5 and Table S2B).  
319 Predicted pathway analysis showed that several pathways were under-represented  
320 in the *H. pylori*-induced atrophic gastritis group, including succinate dehydrogenase  
321 (Table S3). Over-represented pathways included fumarate reductase (Table S3).

322

### 323 *Normal stomach versus autoimmune atrophic gastritis*

324 Streptococcaceae (38%) were the most dominant group identified in the stomachs of  
325 patients who had autoimmune atrophic gastritis, followed by Prevotellaceae (9%),  
326 Flavobacteriaceae (7%), Campylobacteraceae (7%), Enterobacteriaceae (5%) and  
327 Pasteurellaceae (5%). The stomachs of autoimmune atrophic gastritis patients  
328 contained a higher proportion of Streptococcaceae than all other patient groups (Fig  
329 3) and were the only samples that showed complete loss or gain of bacteria rather  
330 than simply changes in bacterial proportions (Fig 4D). For example, the stomachs of  
331 autoimmune atrophic gastritis patients were colonised by *Gemella* and *Bosea* unlike  
332 any other patient group. Alterations in the relative proportions of other bacteria were  
333 also found in the stomachs of patients with autoimmune atrophic gastritis. These  
334 included increases in the proportions of *Streptococcus*, *Campylobacter* and  
335 *Haemophilus* (Table S1).

336 Few co-occurrence networks were identified, presumably due to the dominance of  
337 Streptococcaceae, although *Stenotrophomonas* and *Delftia*; and *Selenomonas* and  
338 *Pseudomonas* showed strong positive correlations (Fig 5D and Table S2B).

339 Predicted pathway analysis suggested that several pathways were over- or under-

340 represented in the stomachs of patients who had autoimmune atrophic gastritis  
341 (table S3).

342

### 343 *H. pylori* gastritis versus *H. pylori*-induced atrophic gastritis

344 We investigated whether the microbiota in the stomachs of patients who had *H.*  
345 *pylori*-induced atrophic gastritis (which were likely to be hypochlorhydric as indicated  
346 by hypergastrinaemia) differed from that in patients who had *H. pylori* gastritis,  
347 normal gastric acid secretion and normogastrinaemia. No significant differences  
348 were identified at the genus level. However, several OTUs belonging to *H. pylori*  
349 were found more frequently in the *H. pylori*-induced atrophic gastritis group, possibly  
350 suggesting the presence of particular strains within this group (Table S4A).  
351 Interestingly, only two other OTUs differed in abundance between these groups,  
352 *Streptococcus mitis* and *Neisseria mucosa*. However, these did not remain  
353 significant once *H. pylori* was removed from the analysis. This suggests that the  
354 presence of atrophy does not result in extensive changes to bacterial communities in  
355 the stomach relative to the simple presence of *H. pylori*, but may result in specific  
356 differences in individual bacterial strains.

357

### 358 **Comparisons between the gastric microbiota of individuals with** 359 **hypochlorhydria of different aetiologies**

360 Patients with *H. pylori*-induced atrophic gastritis and those receiving PPIs had similar  
361 fasting serum gastrin concentrations (median 100pM and 140pM respectively),  
362 possibly suggesting similar degrees of hypochlorhydria (although *H. pylori* infection

363 may have directly contributed to the hypergastrinaemia in the former group). In  
364 contrast patients with autoimmune atrophic gastritis were associated with higher  
365 fasting serum gastrin concentrations (median 800pM; Table 1). No direct association  
366 between fasting serum gastrin concentration and bacterial taxa was observed  
367 between the different groups (PERMANOVA Unifrac P=0.512, weighted Unifrac  
368 P=0.721 and Bray-Curtis P=0.556). This is reflected in the evidence that patients  
369 with *H. pylori*-induced atrophic gastritis and those receiving PPIs exhibited marked  
370 differences in 16S rRNA microbiota profiles, co-occurrence networks and predicted  
371 pathways, despite similar gastrin levels. And that patients with autoimmune atrophic  
372 gastritis showed similarities to individuals with *H. pylori*-induced atrophic gastritis by  
373 predicted pathway analysis, despite markedly different serum gastrin concentrations  
374 (Table S3).

375 Samples from patients with autoimmune atrophic gastritis contained significantly  
376 more *Streptococci* than all other groups (Fig 3 & Table S1). *Streptococcus* did not  
377 appear to be similarly increased in *H. pylori*-induced atrophic gastritis; this may have  
378 been due to the negative relationship observed between *Helicobacter* and  
379 *Streptococcus* identified in co-occurrence networks (Fig 5C).

380 Gastric biopsies from patients with autoimmune atrophic gastritis and those on PPIs  
381 both showed greater bacterial diversity than was observed in the stomachs of  
382 patients with *H. pylori*-induced atrophic gastritis (Fig 2). At the genus level, patients  
383 with autoimmune atrophic gastritis showed significant increases in *Tannerella*,  
384 *Dorea*, *Streptococcus*, *Fusobacterium* and *Campylobacter* compared to the patients  
385 with *H. pylori*-induced atrophic gastritis (Table S4B). The stomachs of PPI-treated  
386 patients also contained significantly higher proportions of *Fusobacterium* and  
387 *Campylobacter* than the stomachs of *H. pylori*-induced atrophic gastritis patients.

388 Furthermore, patients receiving PPI treatment showed significantly higher  
389 proportions of *Flavisolibacter* and *Dermacoccus* in their stomachs than autoimmune  
390 atrophic gastritis patients, but significantly less *Paludibacter*, *Granulicatella*,  
391 *Streptococcus*, and *Neisseria*.

392 Patients who had atrophic gastritis due to *H. pylori* or an autoimmune aetiology both  
393 showed over-representation of several mutual pathways compared to controls (Table  
394 S3). However, differences between the two groups were also observed. For  
395 example, glucose-6-phosphate 1-dehydrogenase and D-lactate dehydrogenase  
396 pathways were over-represented in the stomachs of patients who had *H. pylori*-  
397 induced atrophic gastritis compared to those who had autoimmune atrophic gastritis  
398 (Table S3).

399

400

401

## 402 **DISCUSSION**

403 Gastric samples obtained from subjects who had a normal stomach, no evidence of  
404 *H. pylori* infection and normogastrinaemia had the highest levels of microbial  
405 diversity. This is consistent with other reports of healthy populations showing more  
406 microbial diversity[22, 23, 24]. These samples also contained the greatest proportion  
407 of Prevotellaceae (23%) which corroborates previous research that reported normal  
408 stomachs contained 37% *Prevotella*, reducing to 28% in dyspeptic patients[25]. In  
409 general, the microbiota, co-occurrence networks and predicted pathways in samples  
410 from PPI-treated patients were similar to those in normal stomachs. This agrees with  
411 other reports that PPIs do not significantly influence the gastric microbiota[26, 27]. At  
412 the OTU level however, samples from PPI-treated patients contained significantly  
413 more *Streptococcus*. This has also been observed in gastric[27] and faecal samples  
414 from twins discordant for PPI use[28].

415 *H. pylori* gastritis, and to some extent *H. pylori*-induced atrophic gastritis samples  
416 were dominated by *H. pylori*. This observation may have been exacerbated by our  
417 use of RNA as opposed to DNA for sequencing, unlike many other publications.  
418 When these two techniques were directly compared, *H. pylori* abundance was found  
419 to be 19.9 times higher in RNA compared to DNA from gastric fluid samples, and  
420 was also more dominant in biopsies than gastric fluid[26, 29]. The use of RNA  
421 ensured that only viable bacteria were included in the analysis, giving a better  
422 indication of the taxa that are likely to be influencing the gastric environment. *H.*  
423 *pylori* colonisation was associated with a decrease in gastric bacterial diversity, and  
424 dominance of this organism, which is highly adapted to the gastric environment, has  
425 also been reported previously[6, 30, 31].

426 The majority of changes observed in *H. pylori* gastritis and *H. pylori*-induced atrophic  
427 gastritis samples were due to reductions in non-*H. pylori* bacteria. *H. pylori*-induced  
428 atrophic gastritis samples showed complex co-occurrence networks, unlike *H. pylori*  
429 gastritis which showed few connections, presumably related to the dominance of *H.*  
430 *pylori* itself in those samples. *Campylobacter*, *Prevotella*, *Haemophilus* and  
431 *Veillonella* were amongst the most influential genera in *H. pylori*-induced atrophic  
432 gastritis samples. These bacteria have been previously identified in oral and gastric  
433 samples[29]. The only differences found between the two *H. pylori* patient groups at  
434 the OTU level were increased abundances of specific *H. pylori* OTUs (possibly  
435 suggesting specific bacterial strains) and increased proportions of *Streptococcus*  
436 *mitis* and *Neisseria mucosa* in the atrophic group. The former species and latter  
437 genus have been identified from oral microbiota as potential biomarkers for  
438 pancreatic cancer[32]. *Neisseria* has been shown to produce large amounts of  
439 alcohol dehydrogenase, which produces the carcinogen acetaldehyde, and along  
440 with *H. pylori*'s high production of this enzyme, may also contribute to gastric  
441 carcinogenesis[33]. Some strains of Streptococcaceae have previously been shown  
442 to affect the outcomes of *H. pylori* infection. For example, *S. mitis* induces a coccoid  
443 state in *H. pylori*[34] and this may lead to unsuccessful antibiotic treatment and false  
444 negative diagnostic test results. Moreover, this coccoid form has been suggested to  
445 be more associated with gastric adenocarcinoma development than the spiral  
446 form[35, 36].

447 The stomachs of patients with autoimmune atrophic gastritis (who probably had the  
448 most profound reductions in acid secretion, as suggested by higher fasting serum  
449 gastrin concentrations), showed high bacterial diversity. Samples from this group  
450 also showed significantly higher proportions of *Streptococcus* than any of the other

451 groups. They also contained *Ruminococcus* and *Gemella* unlike any other patient  
452 group except *H. pylori*-induced atrophic gastritis, although they did not contain  
453 genera such as *Arthrobacter*, *Cupriavidus* and *Sneathia*. Therefore, bacterial  
454 communities were both lost and gained in this condition. Co-occurrence networks  
455 appeared to be disrupted by the overabundance of Streptococcaceae resulting in  
456 few connections.

457 The microbial profiles in the stomachs of patients with *H. pylori*-induced atrophic  
458 gastritis and autoimmune atrophic gastritis were quite different. In addition, pathways  
459 such as glucose-6-phosphate 1-dehydrogenase and D-lactate dehydrogenase were  
460 over-represented in the stomachs of patients with *H. pylori*-induced atrophic gastritis  
461 compared to autoimmune atrophic gastritis. Overexpression of these pathways has  
462 been associated with poorer prognoses in gastric cancer[37, 38]. Conversely,  
463 several other metabolic pathways such as fumarate reductase were increased in  
464 representation in patients with both autoimmune and *H. pylori* associated atrophic  
465 gastritis. Fumarate reductase is involved in the metabolism of some bacteria and is  
466 essential for colonisation by *H. pylori* in the mouse stomach[39, 40, 41]. Interestingly,  
467 succinate dehydrogenase (which has an opposite action to fumarate reductase) was  
468 found to be decreased in both atrophic gastritis groups compared to both the normal  
469 and PPI-treated samples. Lower levels of succinate dehydrogenase have previously  
470 been found in gastrointestinal tumours and parietal cells[42, 43]. PPI-treated patients  
471 showed more similarities in microbial diversity and abundance to the patients who  
472 had autoimmune atrophic gastritis, than to the patients who had *H. pylori*-induced  
473 atrophic gastritis.

474

475 **Conclusion**

476 Our findings indicate that *H. pylori* colonisation and hypochlorhydria result in  
477 changes in gastric bacterial abundance and only rarely in loss/gain of bacteria. PPI  
478 treatment did not significantly alter the gastric microbiota from that of a normal  
479 stomach, despite serum gastrin concentrations being comparable to those found in  
480 patients with *H. pylori*-induced atrophic gastritis. Autoimmune atrophic gastritis  
481 resulted in a different, more diverse microbial pattern than that observed in the  
482 stomachs of patients who had *H. pylori*-induced atrophic gastritis. This may be due  
483 to differences in acid secretion between these conditions or other factors such as  
484 different immune profiles. Several biochemical pathways were represented in similar  
485 fashions in both atrophic gastritis groups. In particular, gastric-atrophy was  
486 associated with changes in the citric acid cycle (biochemical pathway that is known  
487 to be associated with gastric carcinogenesis) and our findings suggest that the  
488 microbiota may be an important contributor to this.

489

490



491 **ACKNOWLEDGEMENTS**

492 This study was funded by a grant from Worldwide Cancer Research 12-1028 to  
493 DMP, AV and NH. U.Z. Ijaz is funded by a NERC fellowship NE/L011956/1. MDB  
494 was funded by a CORE / British Society of Gastroenterology Development Grant and  
495 Wellcome Trust / University of Liverpool Institutional Strategic Support Fund grant  
496 under grant agreement number: 097826/Z/11/Z. Patients were recruited to the initial  
497 studies via grants from National Institute for Health Research (NIHR) via the  
498 Liverpool Biomedical Research Centre (BRC) and Trio Medicines Ltd.

499

500 **CONFLICT OF INTERESTS**

501 DMP has previously received research funding from Trio Medicines Ltd to investigate  
502 the treatment of gastric neuroendocrine tumours using Netazepide. None of the  
503 other authors has any conflict of interests.

504

505 **AUTHOR CONTRIBUTIONS**

506 BNP contributed to, analysis, interpretation and acquisition of data, drafting and  
507 critically appraising the manuscript. UZI performed and designed analysis, performed  
508 statistical analysis, interpreted data and critically appraised the manuscript. RD'A  
509 designed methodology, acquired data and critically appraised the manuscript. MDB  
510 contributed to analysis and interpretation of data, statistical analysis and critically  
511 appraising the manuscript. RE, CAD and ARM contributed to methodology,  
512 acquisition of data and critically appraising the manuscript. LT provided pathology  
513 expertise, interpretation of data and critically appraised the manuscript. AV, NH and  
514 DMP formulated conception of the study, its design, secured funding, interpreted

515 data and critically appraised the manuscript. All authors approved the final version of  
516 the manuscript and agree to accountability for all aspects of the work.

517

518 **FIGURE LEGENDS**

519 **Table 1.** Summary of patient group characteristics. ND = Not done, IQR =

520 Interquartile range, 25% and 75%.

521 **Figure 1.** (A) Median fasting serum gastrin concentrations (pM) in patient groups.

522 Kruskal-Wallis test with Dunn's comparison, plotted using Tukey's method \*=P<0.05,

523 and \*\*\*\*=P<0.0001 vs control. (B) Mean number of OTUs identified within each

524 patient group, 1-way ANOVA and Tukey's multiple comparison test \*=P<0.05,

525 \*\*=P<0.01, Control vs Autoimmune atrophic gastritis P=0.059, Control vs Neg

526 P=0.061 and Hp-induced atrophic gastritis vs Neg P=0.059.

527 **Figure 2.** Five different diversity indices of human gastric microbiota (Fisher alpha:

528 parametric index of diversity that models species as logseries distribution; Pielou's

529 evenness: how close in numbers each species is; Richness: number of species per

530 sample; Shannon: a commonly used index to characterise species diversity; and

531 Simpson: which takes into account the number of species present, as well as their

532 relative abundance). Pair-wise ANOVA was performed between different groups and

533 if significant (P<0.001), the p-values have been drawn on top. Atrophy=H. pylori

534 associated atrophy, Auto=autoimmune atrophic gastritis, Control=normal stomach,

535 HP Gast=H. pylori associated gastritis, PPI=proton pump inhibitor and Neg=

536 extraction control.

537 **Figure 3.** Relative abundances of taxa found within (A) groups and (B) individual

538 human gastric biopsies. Hp=H. pylori, IM=intestinal metaplasia, IM+At=intestinal

539 metaplasia and atrophy, PPI=proton pump inhibitor, EC=extraction controls (one of

540 the EC samples was included in a run with more H. pylori dominant samples),

541 H=H<sub>2</sub>O and M=mock community (which showed consistent findings on two runs as

542 shown). All *H. pylori* atrophic gastritis samples were positive for *H. pylori* by serology,  
543 + indicates whether these samples were also positive by histology/rapid urease test.  
544 Autoimmune atrophic gastritis samples recorded as 's' were also positive for *H. pylori*  
545 by serology.

546 **Figure 4.** Nonmetric distance scaling (NMDS) demonstrating clustering of patient  
547 groups using (A) unweighted Unifrac distance (pair-wise distance between samples  
548 is calculated as a normalised difference in cumulative branch lengths of the  
549 observed OTUs for each sample on the phylogenetic tree without taking into account  
550 their abundances in samples), (B) Bray-Curtis distance (abundance of OTUs alone  
551 and not considering the phylogenetic distance) and (C) weighted Unifrac  
552 (unweighted unifrac distance weighted by abundances of OTUs). Serum gastrin  
553 concentration indicated by size of each point. Ellipses represent 95% CI of standard  
554 error for a given group. Dotted ellipses represent the 95% CI of standard error when  
555 *H. pylori* were removed from the analysis. Atrophy=*H. pylori* associated atrophic  
556 gastritis, Auto=autoimmune atrophic gastritis, Control=normal, HP Gastr=*H. pylori*  
557 associated gastritis and PPI=proton pump inhibitor. PERMANOVA (distances against  
558 groups) suggests significant differences ( $P < 0.001$  for all three distances) in microbial  
559 community explaining the following variations ( $R^2$ ) between groups: 10% (8.6%  
560 without *H. pylori* when using Unweighted Unifrac; 58% (14.5% without *H. pylori*)  
561 when using Weighted Unifrac; and 15% when using Bray-Curtis distance. No  
562 significant explanation was observed ( $P > 0.05$ ) for age, BMI, or serum gastrin  
563 concentration in the PERMANOVA test. (D) Data from betadisper plots (a mean to  
564 compare the spread/variability of samples for different groups) representing  
565 difference in distances (Bray-Curtis, Unweighted and weighted Unifrac) of group  
566 members from the centre/mean of individual groups after obtaining a reduced-order

567 representation of abundance table using Principle Coordinate Analysis. The pair-  
568 wise differences in distances from group centre/mean were then subjected to  
569 ANOVA and if significant ( $P < 0.001$ ), the p-values were drawn on top.

570 **Figure 5.** Co-occurrence network analysis between different genera (OTUs collated  
571 together at genus level) when considering samples for (A) normal stomach, (B) *H.*  
572 *pylori* gastritis, (C) *H. pylori*-induced atrophic gastritis and (D) autoimmune atrophic  
573 gastritis. The genera were connected (Blue: positive correlation; Red: negative  
574 correlation) when the pair-wise correlation values were significant ( $P_{\text{adj}} < 0.05$ ) after  
575 adjusting the P values for multiple comparisons. Furthermore, subcommunity  
576 detection was performed by placing the genera in the same subcommunity  
577 (represented by colour of nodes) when many links were found at correlation values  
578  $> 0.75$  between members of the subcommunity. The size of the nodes represent the  
579 degree of connections.

580

### 581 **Supplementary Figure and Table Legends**

582 **Figure S1.** Relative abundances of taxa found within human gastric biopsies after  
583 removal of Helicobacteraceae. Hp=*H. pylori*, IM=intestinal metaplasia,  
584 IM+At=intestinal metaplasia and atrophy, PPI=proton pump inhibitor. All *H. pylori*  
585 atrophy samples were positive for *H. pylori* by serology.

586 **Figure S2.** Co-occurrence network analysis between different genera (OTUs  
587 collated together at genus level) when considering samples for (A) PPI. The genera  
588 were connected (Blue: positive correlation; Red: negative correlation) when the pair-  
589 wise correlation values were significant ( $P_{\text{adj}} < 0.05$ ) after adjusting the P values for

590 multiple comparisons. Furthermore, subcommunity detection was performed by  
591 placing the genera in the same subcommunity (represented by colour of nodes)  
592 when many links were found at correlation values  $>0.75$  between members of the  
593 subcommunity. The size of the nodes represent the degree of connections (B)  
594 network-wide statistics by degree, closeness, betweenness and eigenvalue centrality  
595 for *H. pylori* atrophic gastritis cases. The nodes (coloured with respect to  
596 subcommunity they are part of) were placed on concentric circles with values  
597 increasing from center to the periphery. A high betweenness for a node suggests  
598 many connections, whereas a high eigenvalue centrality suggests that those  
599 connections, in turn, are all well connected. On average a high betweenness and at  
600 the same time low eigenvalue centrality for a subcommunity suggests a  
601 keystone/important subcommunity.

602

603 **Table S1.** Significantly different genera identified between normal stomach samples  
604 and PPI, autoimmune atrophic gastritis, *H. pylori*-induced atrophic gastritis and *H.*  
605 *pylori* gastritis. The most significant species are identified at the top. Differential  
606 expression analysis based on the Negative Binomial (Gamma-Poisson) distribution  
607 and were corrected for multiple comparisons. \* indicates a genus no longer  
608 significant when *H. pylori* was removed from the analysis.

609 **Table S2A.** Stable bacterial populations and correlations in PPI patients compared  
610 to other groups (if the correlation between two genera were consistently positive or  
611 negative in different groups). PPI versus *H. pylori*-induced atrophic gastritis in table  
612 S2B. No significant comparisons were found between PPI and autoimmune atrophic  
613 gastritis groups.

614 **Table S2B.** Stable bacterial populations and correlations in *H. pylori*-induced  
615 atrophic gastritis patients compared to other groups.

616 **Table S3.** The top most significant predicted pathways found for each group  
617 comparison.

618 **Table S4A.** Significant bacterial species identified between *H. pylori* atrophic gastritis  
619 and *H. pylori* gastritis. The most significant species are identified at the top.  
620 Differential expression analysis based on the Negative Binomial (Gamma-Poisson)  
621 distribution. Streptococcus identified by BLAST as *S. mitis* with 98% coverage, 99%  
622 identity and *Neisseria mucosa* had 98% coverage and 100% identity. None of these  
623 OTUs remained significant when *H. pylori* was removed from the analysis.

624 **Table S4B.** Significant bacterial genera identified between autoimmune atrophic  
625 gastritis and *H. pylori*-induced atrophic gastritis. The most significant species are  
626 identified at the top. Differential expression analysis based on the Negative Binomial  
627 (Gamma-Poisson) distribution. NB when *H. pylori* was removed from the analysis  
628 these genera remained significant, with an additional genus *Desulfobulbus* also  
629 reaching significance.

630

631

632

633

634

635 **REFERENCES**

- 636 1 Ferlay J, Soerjomataram I, Ervik M, *et al.* GLOBOCAN 2012 v1.0, Cancer  
637 Incidence and Mortality Worldwide: IARC CancerBase No. 11 [Internet]. Lyon,  
638 France: International Agency for Research on Cancer; 2013. Available from:  
639 <http://globocan.iarc.fr>, accessed on 19/07/16.
- 640 2 Uemura N, Okamoto S, Yamamoto S, *et al.* Helicobacter pylori infection and  
641 the development of gastric cancer. The New England journal of medicine  
642 2001;**345**:784-9.
- 643 3 Vannella L, Lahner E, Osborn J, *et al.* Systematic review: gastric cancer  
644 incidence in pernicious anaemia. Alimentary pharmacology & therapeutics  
645 2013;**37**:375-82.
- 646 4 Burkitt MD, Pritchard DM. Review article: Pathogenesis and management of  
647 gastric carcinoid tumours. Alimentary pharmacology & therapeutics 2006;**24**:1305-  
648 20.
- 649 5 Song H, Zhu J, Lu D. Long-term proton pump inhibitor (PPI) use and the  
650 development of gastric pre-malignant lesions. The Cochrane database of systematic  
651 reviews 2014:CD010623.
- 652 6 Bik EM, Eckburg PB, Gill SR, *et al.* Molecular analysis of the bacterial  
653 microbiota in the human stomach. Proceedings of the National Academy of Sciences  
654 of the United States of America 2006;**103**:732-7.
- 655 7 Huang BR, Tsai CF, Lin HY, *et al.* Interaction of inflammatory and anti-  
656 inflammatory responses in microglia by Staphylococcus aureus-derived lipoteichoic  
657 acid. Toxicology and applied pharmacology 2013;**269**:43-50.



- 658 8 Correa P. Human gastric carcinogenesis: a multistep and multifactorial  
659 process--First American Cancer Society Award Lecture on Cancer Epidemiology and  
660 Prevention. *Cancer research* 1992;**52**:6735-40.
- 661 9 Ziebarth D, Spiegelhalder B, Bartsch H. N-nitrosation of medicinal drugs  
662 catalysed by bacteria from human saliva and gastro-intestinal tract, including  
663 *Helicobacter pylori*. *Carcinogenesis* 1997;**18**:383-9.
- 664 10 Biarc J, Nguyen IS, Pini A, *et al.* Carcinogenic properties of proteins with pro-  
665 inflammatory activity from *Streptococcus infantarius* (formerly *S.bovis*).  
666 *Carcinogenesis* 2004;**25**:1477-84.
- 667 11 Brestoff JR, Artis D. Commensal bacteria at the interface of host metabolism  
668 and the immune system. *Nature immunology* 2013;**14**:676-84.
- 669 12 Catsburg CE, Gago-Dominguez M, Yuan JM, *et al.* Dietary sources of N-  
670 nitroso compounds and bladder cancer risk: Findings from the Los Angeles bladder  
671 cancer study. *International journal of cancer Journal international du cancer* 2013.
- 672 13 Keszei AP, Goldbohm RA, Schouten LJ, *et al.* Dietary N-nitroso compounds,  
673 endogenous nitrosation, and the risk of esophageal and gastric cancer subtypes in  
674 the Netherlands Cohort Study. *The American journal of clinical nutrition*  
675 2013;**97**:135-46.
- 676 14 Kumar JD, Steele I, Moore AR, *et al.* Gastrin stimulates MMP-1 expression in  
677 gastric epithelial cells: putative role in gastric epithelial cell migration. *American*  
678 *journal of physiology Gastrointestinal and liver physiology* 2015;**309**:G78-86.
- 679 15 Moore AR, Boyce M, Steele IA, *et al.* Netazepide, a gastrin receptor  
680 antagonist, normalises tumour biomarkers and causes regression of type 1 gastric  
681 neuroendocrine tumours in a nonrandomised trial of patients with chronic atrophic  
682 gastritis. *PloS one* 2013;**8**:e76462.

- 683 16 Boyce M, Moore AR, Sagatun L, *et al.* Netazepide, a gastrin/cholecystokinin-2  
684 receptor antagonist, can eradicate gastric neuroendocrine tumours in patients with  
685 autoimmune chronic atrophic gastritis. *Br J Clin Pharmacol* 2016.
- 686 17 TRI-Reagent®. Extraction Protocol. [http://www.sigmaaldrich.com/technical-](http://www.sigmaaldrich.com/technical-documents/protocols/biology/tri-reagent.html)  
687 [documents/protocols/biology/tri-reagent.html](http://www.sigmaaldrich.com/technical-documents/protocols/biology/tri-reagent.html) Accessed 16/12/15.
- 688 18 Dockray GJ. Immunochemical studies on big gastrin using NH<sub>2</sub>-terminal  
689 specific antisera. *Regulatory peptides* 1980;**1**:169-86.
- 690 19 Varro A, Ardill JE. Gastrin: an analytical review. *Annals of clinical biochemistry*  
691 2003;**40**:472-80.
- 692 20 Laufer AS, Metlay JP, Gent JF, *et al.* Microbial communities of the upper  
693 respiratory tract and otitis media in children. *mBio* 2011;**2**:e00245-10.
- 694 21 Salter SJ, Cox MJ, Turek EM, *et al.* Reagent and laboratory contamination  
695 can critically impact sequence-based microbiome analyses. *BMC biology*  
696 2014;**12**:87.
- 697 22 Manichanh C, Rigottier-Gois L, Bonnaud E, *et al.* Reduced diversity of faecal  
698 microbiota in Crohn's disease revealed by a metagenomic approach. *Gut*  
699 2006;**55**:205-11.
- 700 23 Li TH, Qin Y, Sham PC, *et al.* Alterations in Gastric Microbiota After H. Pylori  
701 Eradication and in Different Histological Stages of Gastric Carcinogenesis. *Scientific*  
702 *reports* 2017;**7**:44935.
- 703 24 Gao Z, Guo B, Gao R, *et al.* Microbiota disbiosis is associated with colorectal  
704 cancer. *Front Microbiol* 2015;**6**:20.
- 705 25 Nakae H, Tsuda A, Matsuoka T, *et al.* Gastric microbiota in the functional  
706 dyspepsia patients treated with probiotic yogurt. *BMJ Open Gastroenterol*  
707 2016;**3**:e000109.

- 708 26 von Rosenvinge EC, Song Y, White JR, *et al.* Immune status, antibiotic  
709 medication and pH are associated with changes in the stomach fluid microbiota. The  
710 ISME journal 2013;**7**:1354-66.
- 711 27 Paroni Sterbini F, Palladini A, Masucci L, *et al.* Effects of Proton Pump  
712 Inhibitors on the Gastric Mucosa-Associated Microbiota in Dyspeptic Patients.  
713 Applied and environmental microbiology 2016;**82**:6633-44.
- 714 28 Jackson MA, Goodrich JK, Maxan ME, *et al.* Proton pump inhibitors alter the  
715 composition of the gut microbiota. Gut 2016;**65**:749-56.
- 716 29 Schulz C, Schutte K, Koch N, *et al.* The active bacterial assemblages of the  
717 upper GI tract in individuals with and without Helicobacter infection. Gut 2016.
- 718 30 Martin ME, Bhatnagar S, George MD, *et al.* The impact of Helicobacter pylori  
719 infection on the gastric microbiota of the rhesus macaque. PloS one 2013;**8**:e76375.
- 720 31 Eun CS, Kim BK, Han DS, *et al.* Differences in Gastric Mucosal Microbiota  
721 Profiling in Patients with Chronic Gastritis, Intestinal Metaplasia, and Gastric Cancer  
722 Using Pyrosequencing Methods. Helicobacter 2014;**19**:407-16.
- 723 32 Farrell JJ, Zhang L, Zhou H, *et al.* Variations of oral microbiota are associated  
724 with pancreatic diseases including pancreatic cancer. Gut 2012;**61**:582-8.
- 725 33 Muto M, Hitomi Y, Ohtsu A, *et al.* Acetaldehyde production by non-pathogenic  
726 Neisseria in human oral microflora: implications for carcinogenesis in upper  
727 aerodigestive tract. International journal of cancer Journal international du cancer  
728 2000;**88**:342-50.
- 729 34 Khosravi Y, Dieye Y, Loke MF, *et al.* Streptococcus mitis Induces Conversion  
730 of Helicobacter pylori to Coccoid Cells during Co-Culture In Vitro. PloS one  
731 2014;**9**:e112214.

- 732 35 Chan WY, Hui PK, Leung KM, *et al.* Coccoid forms of *Helicobacter pylori* in  
733 the human stomach. *American journal of clinical pathology* 1994;**102**:503-7.
- 734 36 Li N, Han L, Chen J, *et al.* Proliferative and apoptotic effects of gastric  
735 epithelial cells induced by coccoid *Helicobacter pylori*. *Journal of basic microbiology*  
736 2013;**53**:147-55.
- 737 37 Kim HS, Lee HE, Yang HK, *et al.* High lactate dehydrogenase 5 expression  
738 correlates with high tumoral and stromal vascular endothelial growth factor  
739 expression in gastric cancer. *Pathobiology* 2014;**81**:78-85.
- 740 38 Wang J, Yuan W, Chen Z, *et al.* Overexpression of G6PD is associated with  
741 poor clinical outcome in gastric cancer. *Tumour Biol* 2012;**33**:95-101.
- 742 39 Lancaster CR, Kroger A, Auer M, *et al.* Structure of fumarate reductase from  
743 *Wolinella succinogenes* at 2.2 Å resolution. *Nature* 1999;**402**:377-85.
- 744 40 Ge Z. Potential of fumarate reductase as a novel therapeutic target in  
745 *Helicobacter pylori* infection. *Expert Opin Ther Targets* 2002;**6**:135-46.
- 746 41 Kassem, II, Khatri M, Sanad YM, *et al.* The impairment of  
747 methylmenaquinol:fumarate reductase affects hydrogen peroxide susceptibility and  
748 accumulation in *Campylobacter jejuni*. *Microbiologyopen* 2014;**3**:168-81.
- 749 42 Wang YM, Gu ML, Ji F. Succinate dehydrogenase-deficient gastrointestinal  
750 stromal tumors. *World journal of gastroenterology : WJG* 2015;**21**:2303-14.
- 751 43 Coulton GR, Firth JA. Cytochemical evidence for functional zonation of  
752 parietal cells within the gastric glands of the mouse. *Histochem J* 1983;**15**:1141-50.

753

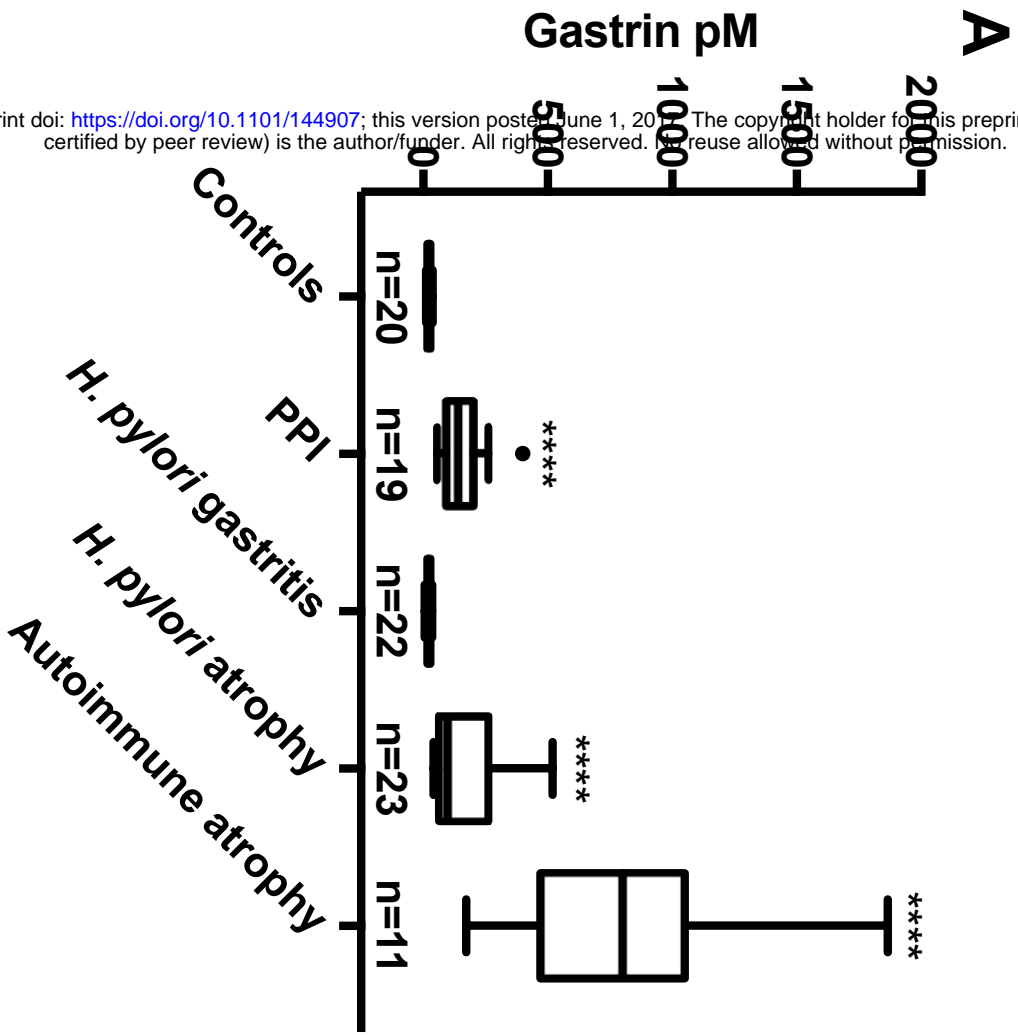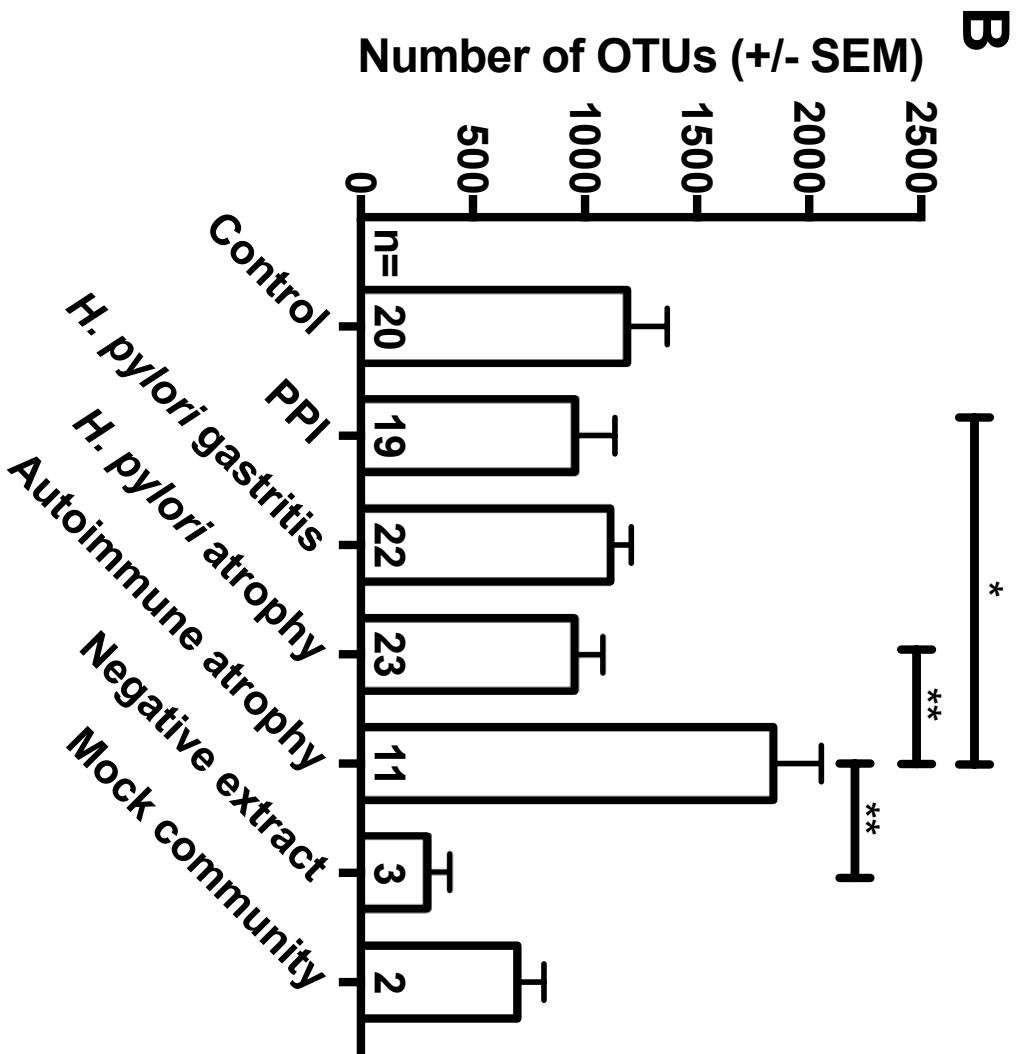

bioRxiv preprint doi: <https://doi.org/10.1101/144907>; this version posted June 1, 2017. The copyright holder for this preprint (which was not certified by peer review) is the author/funder. All rights reserved. No reuse allowed without permission.

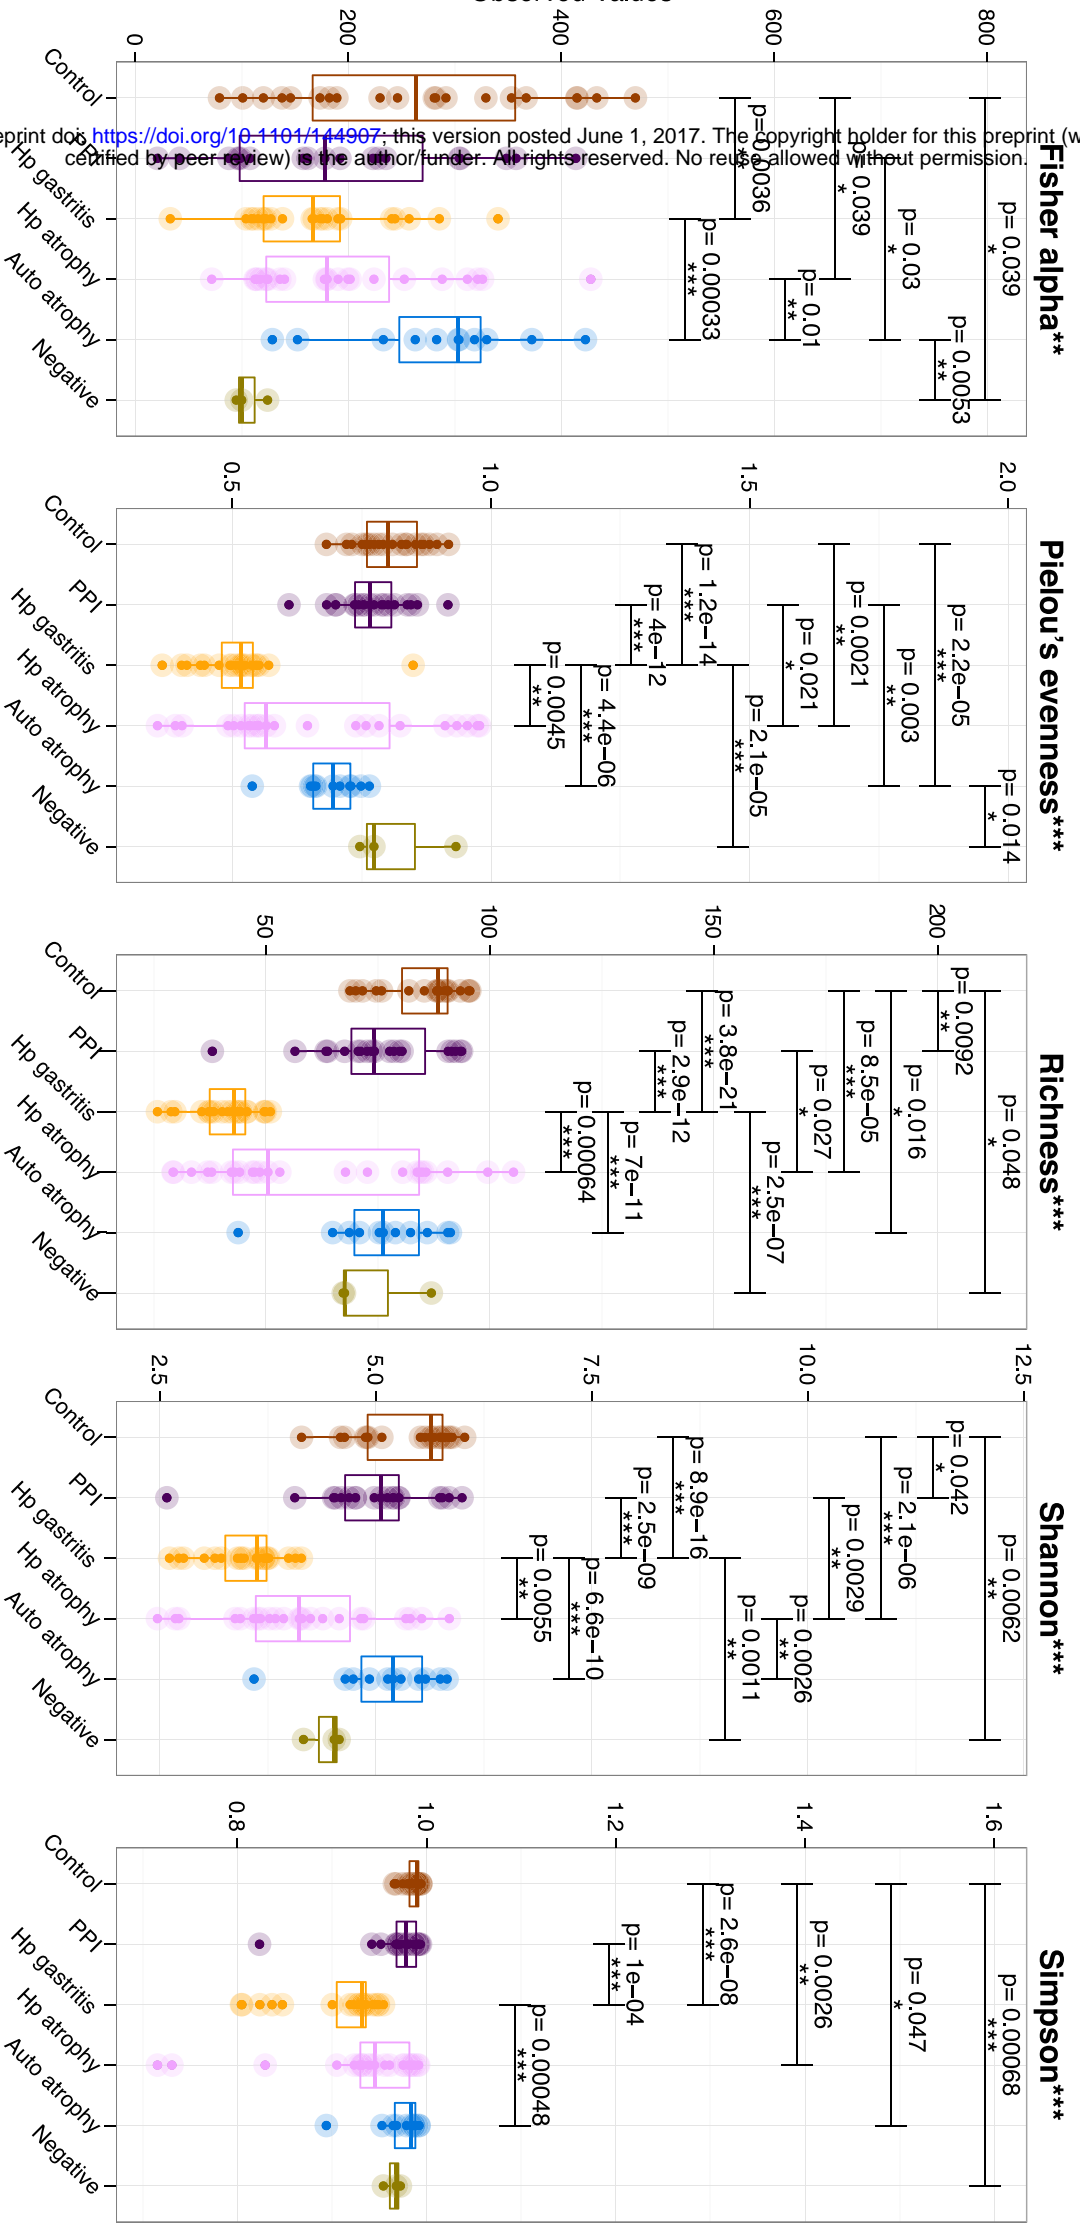

**A****Average relative abundance of taxa (%)**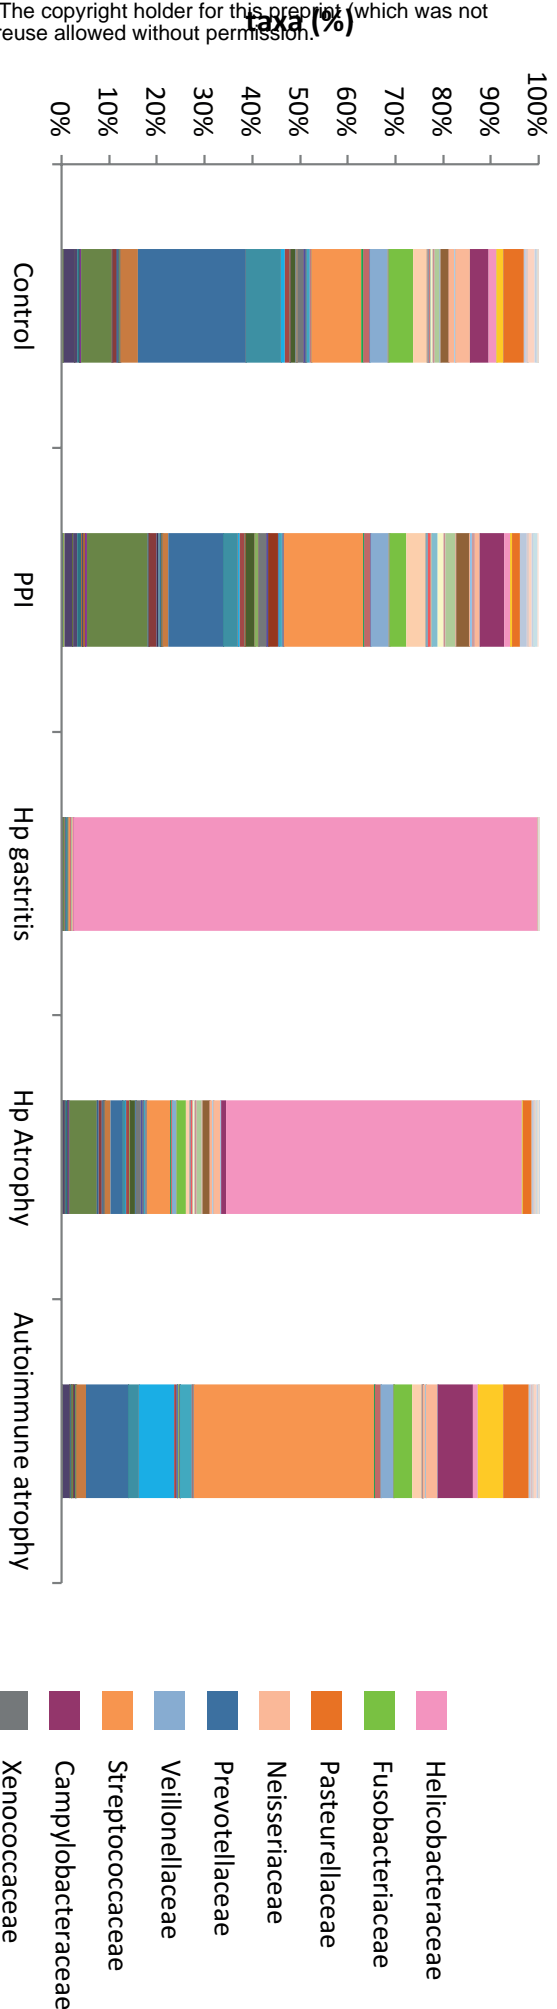**Relative abundance of taxa (%)**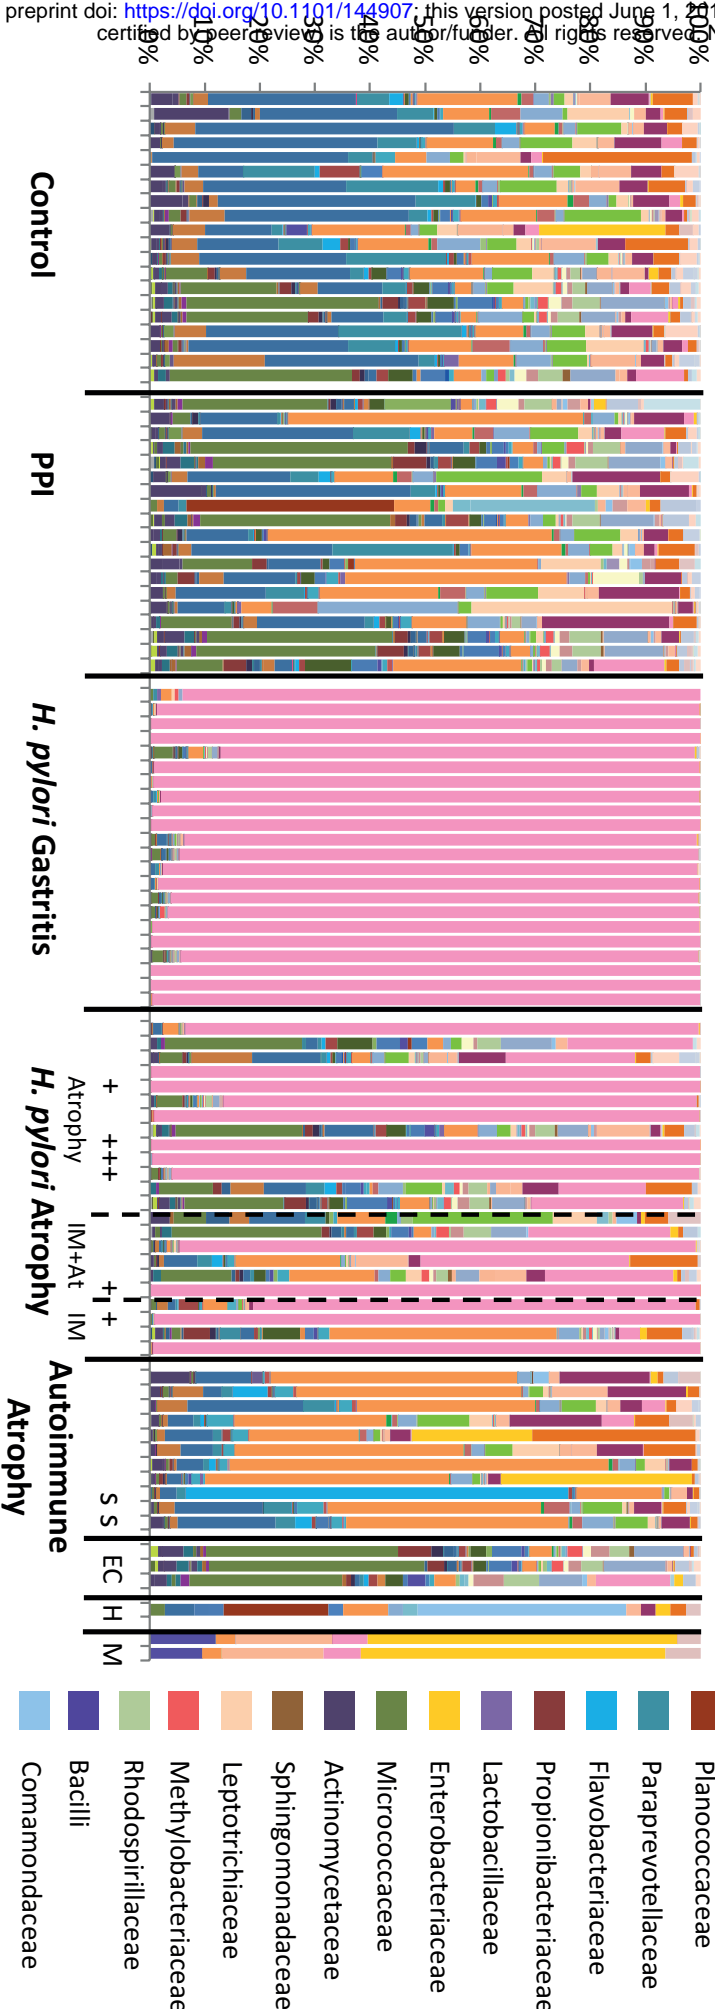

bioRxiv preprint doi: <https://doi.org/10.1101/144907>; this version posted June 1, 2017. The copyright holder for this preprint (which was not certified by peer review) is the author/funder. All rights reserved. No reuse allowed without permission.

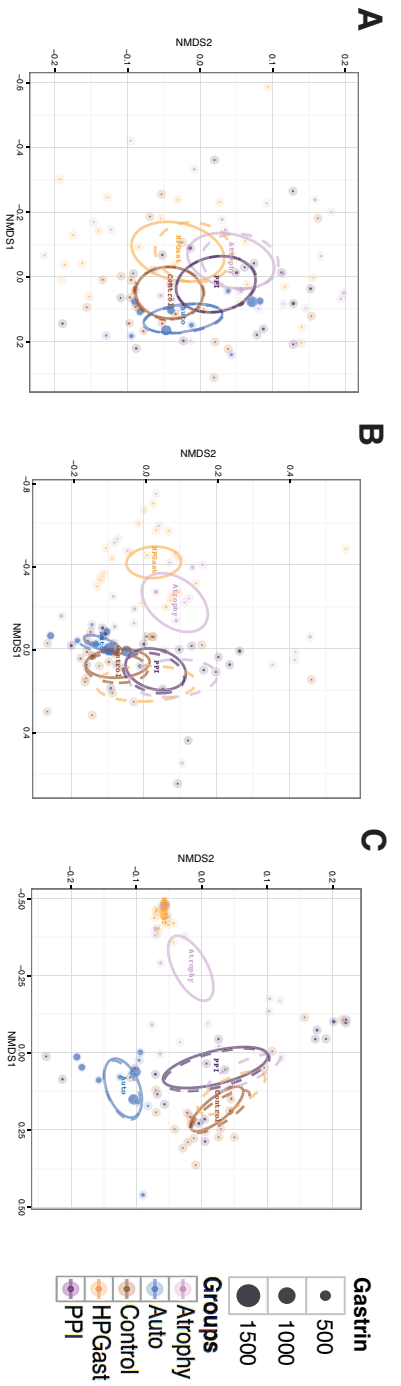

**D**

| <i>H. pylori</i> included in analysis |                                         |                                      | <i>H. pylori</i> removed from analysis |                                         |                                      |                              |
|---------------------------------------|-----------------------------------------|--------------------------------------|----------------------------------------|-----------------------------------------|--------------------------------------|------------------------------|
| Group Comparison                      | Unifrac significance (presence/absence) | Bray-Curtis significance (abundance) | Weighted Unifrac (abundance)           | Unifrac significance (presence/absence) | Bray-Curtis significance (abundance) | Weighted Unifrac (abundance) |
| Control                               | PPI                                     | ns                                   | 0.0116 *                               | ns                                      | ns                                   | 0.0132 *                     |
|                                       | Hp Gastritis                            | ns                                   | 1.3741×10 <sup>-12</sup> ***           | ns                                      | ns                                   | ns                           |
|                                       | Hp Atrophy                              | 0.059                                | ns                                     | ns                                      | 0.0193*                              | ns                           |
| PPI                                   | Autoimmune                              | 0.0638                               | ns                                     | 0.0564                                  | ns                                   | ns                           |
|                                       | Hp Gastritis                            | ns                                   | 9.9989×10 <sup>-25</sup> ***           | ns                                      | ns                                   | ns                           |
|                                       | Hp Atrophy                              | ns                                   | ns                                     | ns                                      | ns                                   | ns                           |
| Hp Gastritis                          | Autoimmune                              | 0.0019 **                            | 0.0037 **                              | 0.0018 **                               | 0.0043 **                            | 0.0034 **                    |
|                                       | Hp Atrophy                              | ns                                   | ns                                     | ns                                      | ns                                   | ns                           |
|                                       | Autoimmune                              | 0.0060 **                            | 0.0080 **                              | 2.5084×10 <sup>-9</sup> ***             | 0.0090 **                            | 0.0249*                      |
| Hp Atrophy                            | 3.159×10 <sup>-5</sup> ***              | ns                                   | 0.0568                                 | 1.191×10 <sup>-4</sup> ***              | 3.765×10 <sup>-4</sup> ***           | 0.0227*                      |



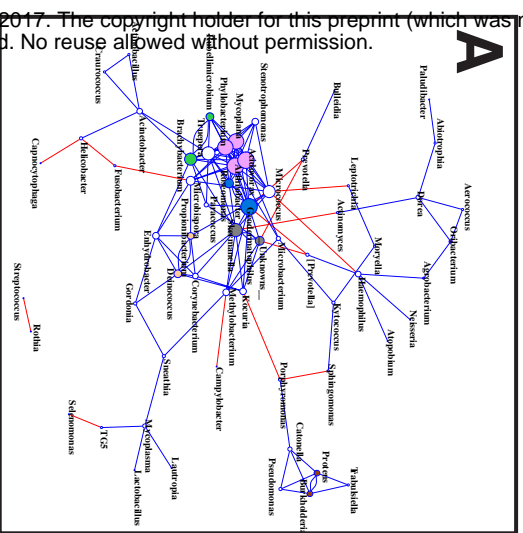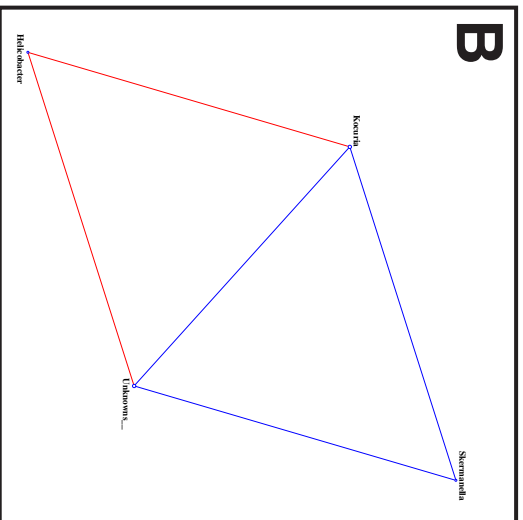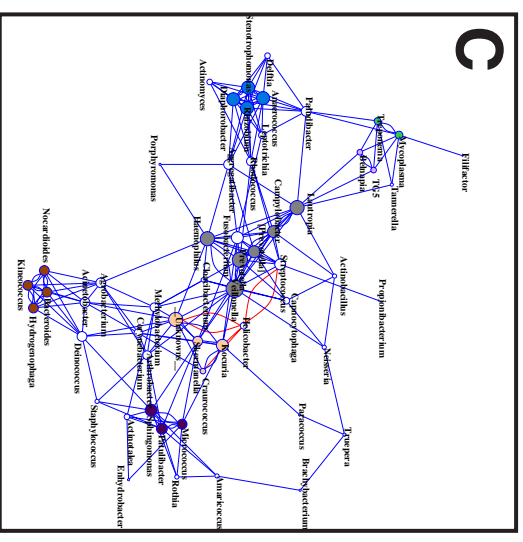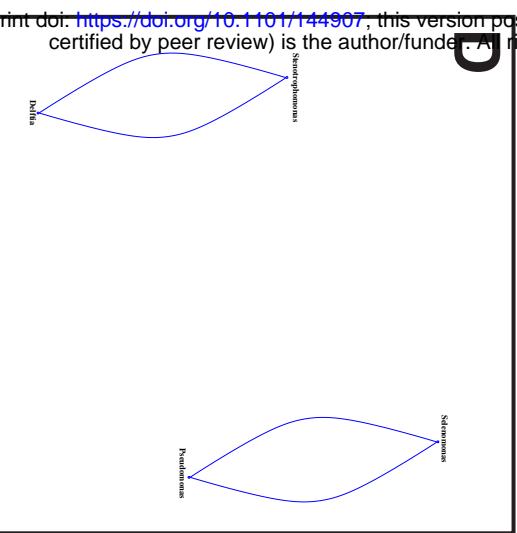

## Autoimmune atrophy
